# Supplementary material for: Highly stable lithium–sulfur batteries based on p–n heterojunctions embedded on hollow sheath carbon propelling polysulfides conversion
Source: Royal Society of Chemistry journal article supplement (doi:10.1039/c9ta00975b), 2019-01-01
Supplement: c9ta00975b1.pdf [file c9ta00975b1.pdf]

## Highly stable lithium-sulfur batteries based on p-n heterojunctions embedded on hollow sheath carbon propelling polysulfides conversion

*Han Zhang,<sup>a</sup> Zongbin Zhao,<sup>\*a</sup> Ya-Nan Hou,<sup>a</sup> Yongchao Tang,<sup>a</sup> Jingjing Liang,<sup>a</sup> Xuguang Liu,<sup>b</sup> Zhichao*

*Zhang,<sup>c</sup> Xuzhen Wang<sup>a,c</sup> and Jiешan Qiu<sup>\*,a</sup>*

<sup>a</sup> State Key Lab of Fine Chemicals, Liaoning Key Lab for Energy Materials and Chemical Engineering, PSU-DUT Joint Center for Energy Research, School of Chemical Engineering, Dalian University of Technology, Dalian 116024, China.

<sup>b</sup> Key Lab of Interface Science and Engineering in Advanced Materials, Ministry of Education, Taiyuan University of Technology, Taiyuan 030024, China

<sup>c</sup> School of Chemistry, Dalian University of Technology, Dalian 116024, China.

\*E-mail addresses: zbzhao@dlut.edu.cn (Z. Zhao), jqiu@dlut.edu.cn (J. Qiu).

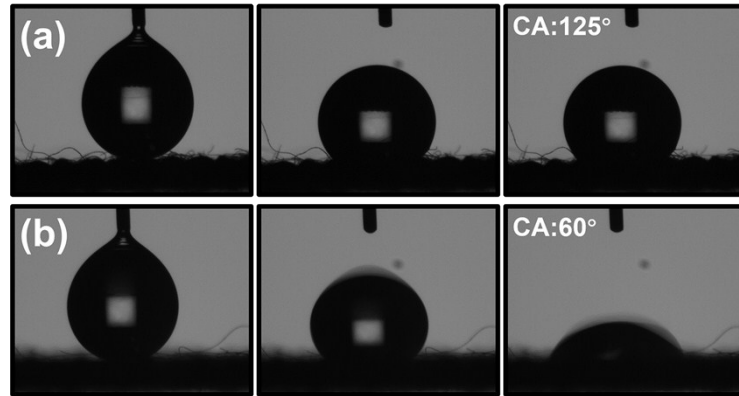

**Fig. S1.** Photographs of static water contact angle of (a) untreated-carbon cloth and (b) the carbon cloth of pre-treated by oxygen plasma.

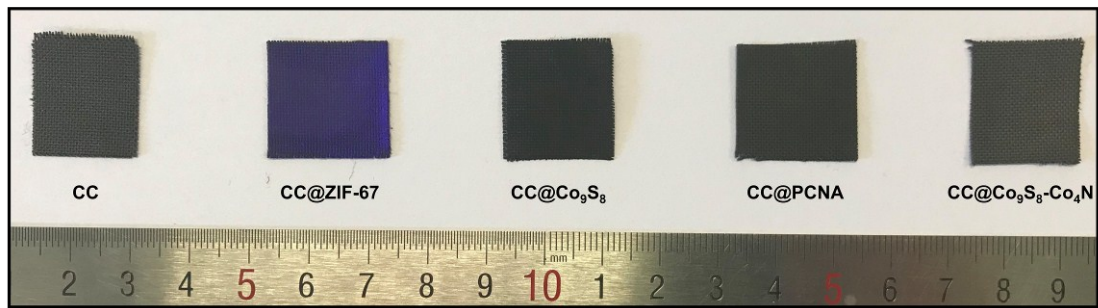

**Fig. S2.** A digital photograph of CC, CC@ZIF-67, CC@Co<sub>9</sub>S<sub>8</sub>, CC@PCNA and CC@Co<sub>9</sub>S<sub>8</sub>-Co<sub>4</sub>N.

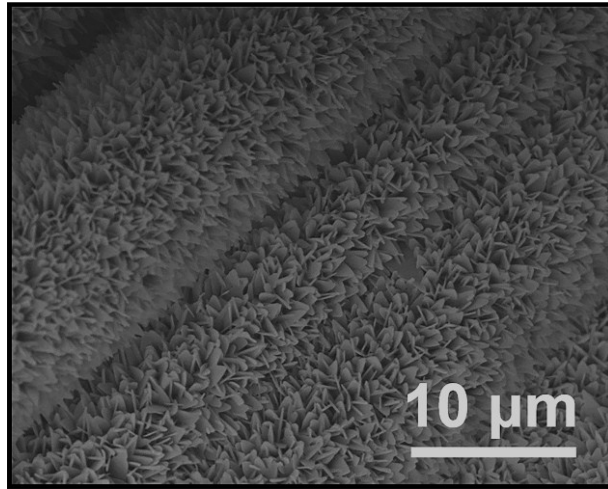

**Fig. S3.** Low-magnification FE-SEM image of CC@ZIF-67.

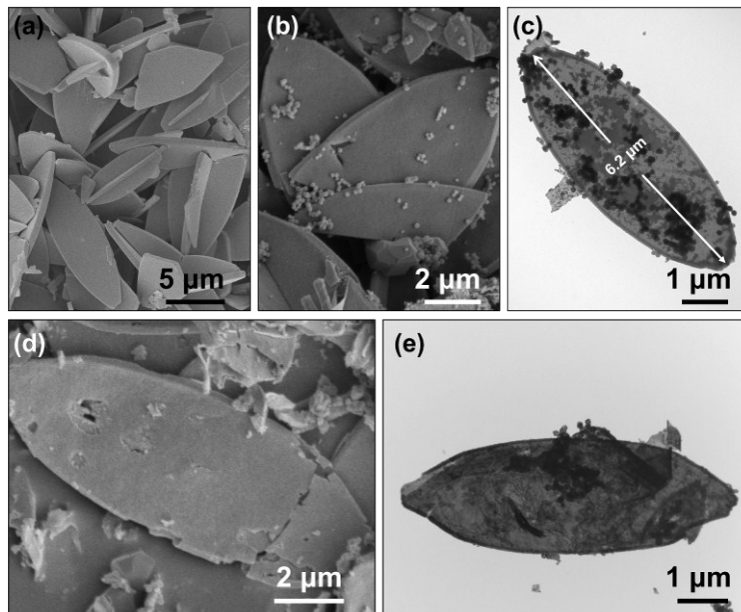

**Fig. S4.** FE-SEM images of (a) ZIF-67, (b) Co<sub>9</sub>S<sub>8</sub> and (d) Co<sub>9</sub>S<sub>8</sub>-Co<sub>4</sub>N. TEM images of (c) Co<sub>9</sub>S<sub>8</sub> and (e) Co<sub>9</sub>S<sub>8</sub>-Co<sub>4</sub>N

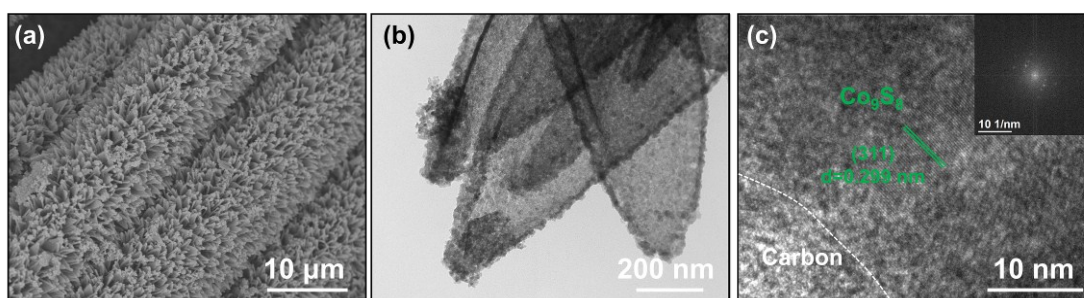

**Fig. S5.** (a) FE-SEM, (b) TEM and (c) HR-TEM images of CC@Co<sub>9</sub>S<sub>8</sub>.

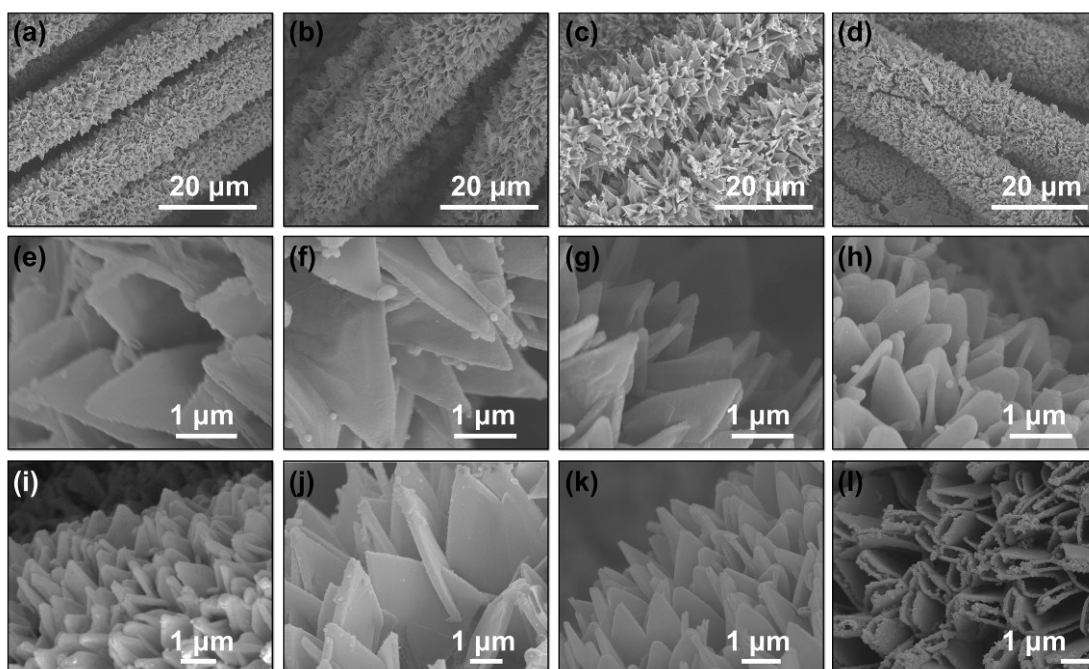

**Fig. S6.** The FE-SEM images show the formation of hollow structure after (a, e, i) 0.5 h, (b, f, j) 1 h, (c, g, k) 2 h and (d, h, l) 4 h of sulfidation reaction, respectively. The FE-SEM images of (a-h) after sulfidation reaction and (i-l) CC@Co<sub>9</sub>S<sub>8</sub>.

During the sulfidation reaction, a series of changes take place subsequently. Firstly, the surface of ZIF-67 form a layer of Co-based sulfides by the S<sup>2-</sup> produced from TAA to react with Co ions. The thin shell can confine the further contact between the S<sup>2-</sup> and internal Co ions. Secondly, compared with S<sup>2-</sup> (184 pm), the Co ions (74 pm) has smaller ionic radius. With a mechanism similar to the Kirkendall effect, the internal Co ions released from ZIF-67 can penetrated the shell layer of sulfides to continue the reaction with external sulfur ions, resulting in the formation of a hollow structure.

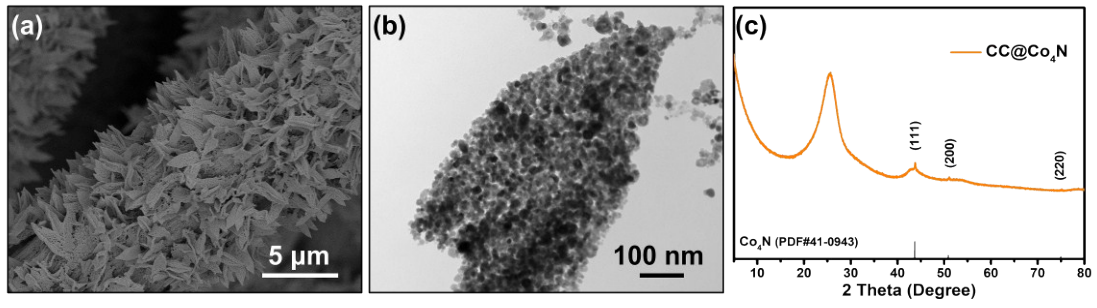

**Fig. S7.** (a) FE-SEM images, (b) TEM images and (c) XRD patterns of CC@Co<sub>4</sub>N.



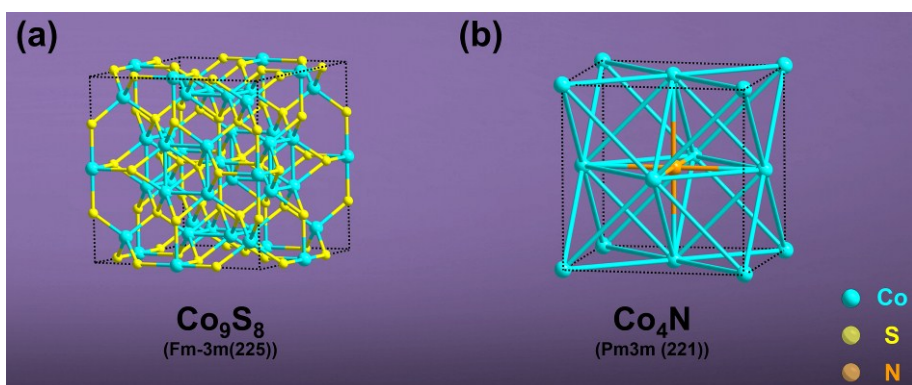

**Fig. S8.** Unit cells of Co<sub>9</sub>S<sub>8</sub> and Co<sub>4</sub>N structures.

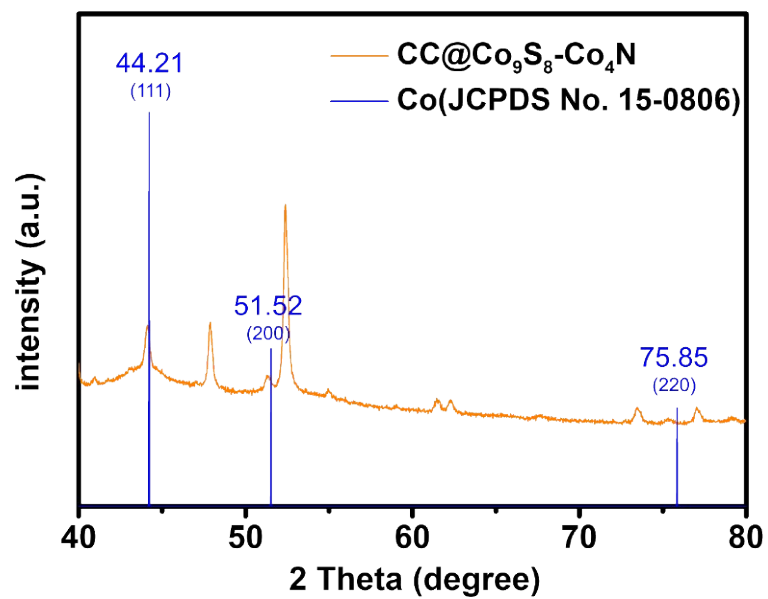

**Fig. S9.** XRD patterns of Co and CC@Co<sub>9</sub>S<sub>8</sub>-Co<sub>4</sub>N. The standard XRD pattern for fcc Co (JCPDS No. 15-0806).

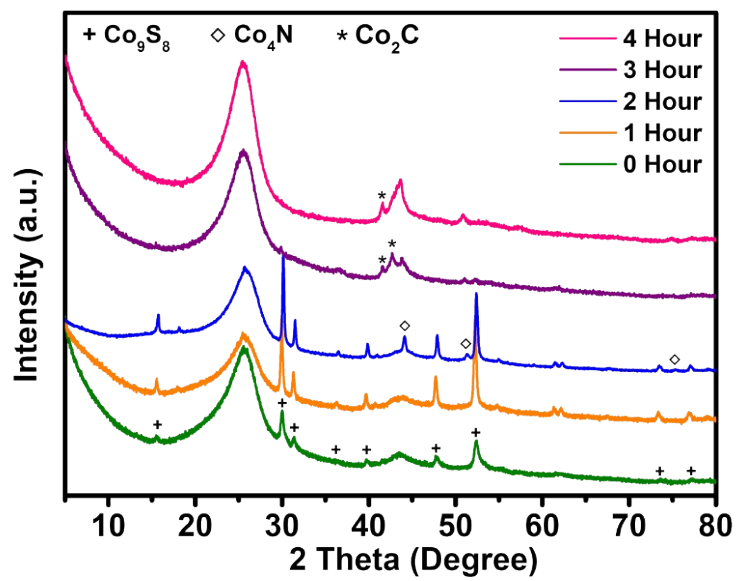

**Fig. S10.** The XRD patterns of Co-based compounds obtained at different nitridation time (0, 1, 2, 3 and 4 h).

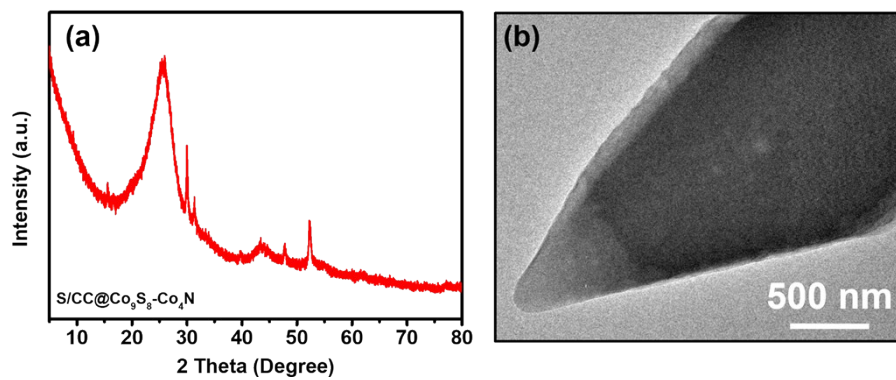

**Fig. S11.** (a) XRD pattern of S/CC@Co<sub>9</sub>S<sub>8</sub>-Co<sub>4</sub>N, (b) TEM image of S/CC@Co<sub>9</sub>S<sub>8</sub>-Co<sub>4</sub>N.

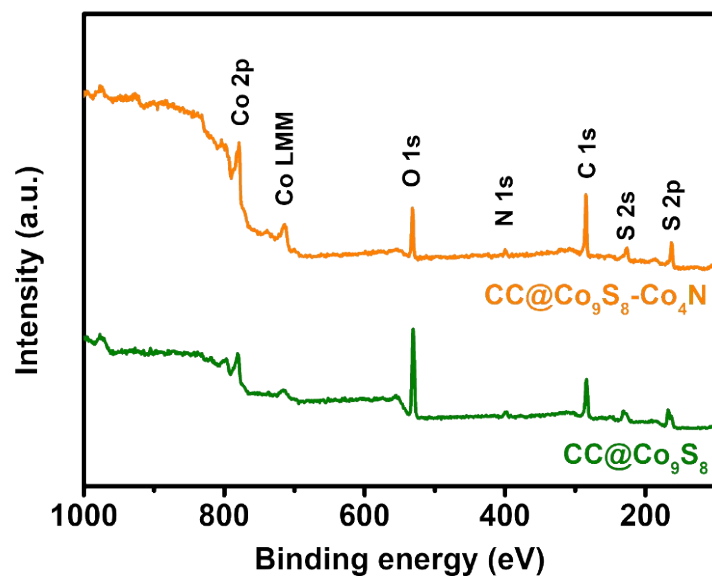

**Fig. S12.** XPS survey spectra of  $CC@Co_9S_8$  and  $CC@Co_9S_8-Co_4N$ .

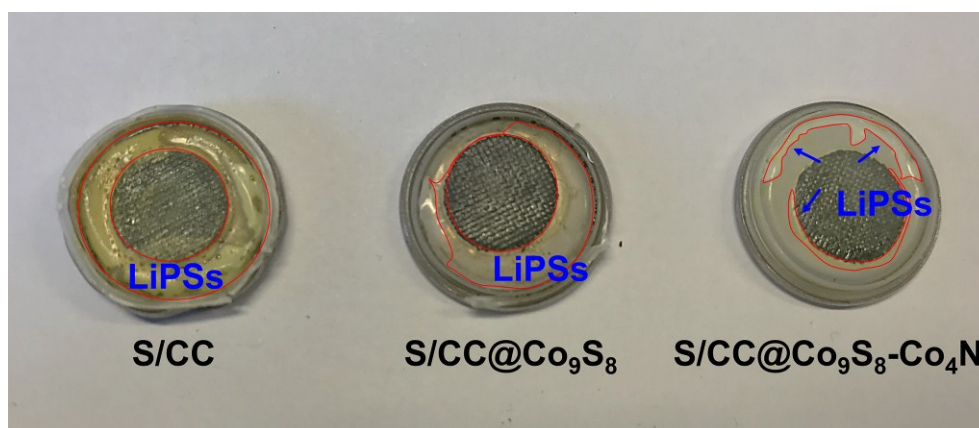

**Fig. S13.** Digital photo of cycled separators of S/CC, S/CC@Co<sub>9</sub>S<sub>8</sub> and S/CC@Co<sub>9</sub>S<sub>8</sub>-Co<sub>4</sub>N.

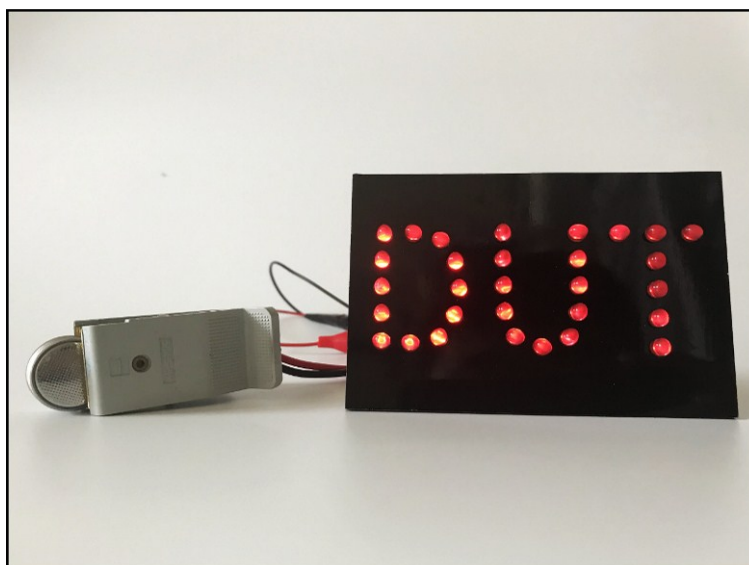

**Fig. S14.** Digital photo that shows the lithium-sulfur batteries powering 30 LED device.

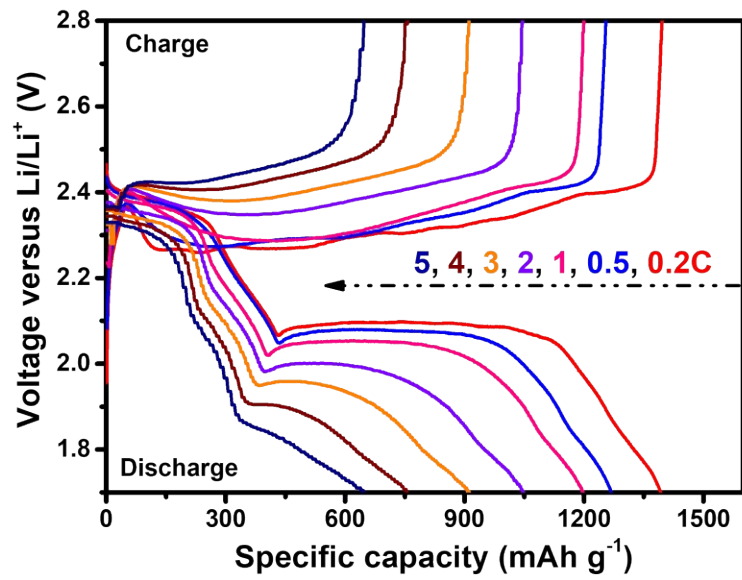

**Fig. S15.** Galvanostatic charge/discharge curves at current rate of 0.2, 0.5, 1, 2, 3, 4 and 5 C tested between 1.7~2.8 V of S/CC@Co<sub>9</sub>S<sub>8</sub>-Co<sub>4</sub>N.



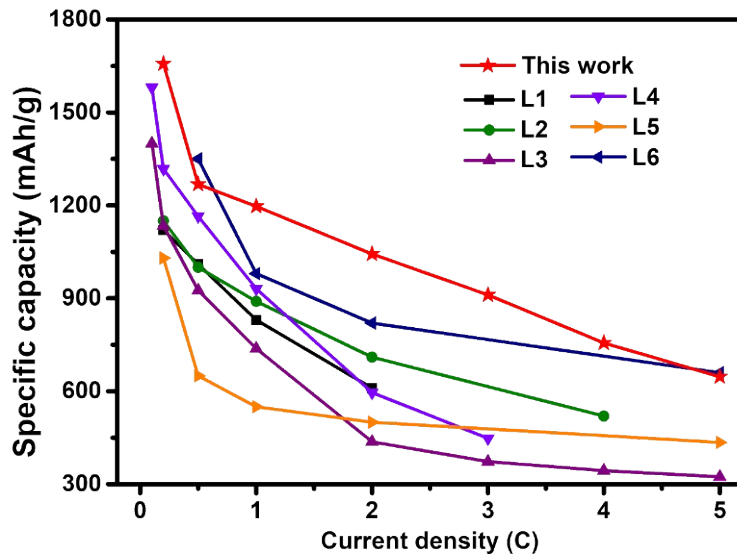

**Fig. S16.** A comparison of S/CC@Co<sub>9</sub>S<sub>8</sub>-Co<sub>4</sub>N heterostructure with recently reported carbon cloth/fiber cathode materials in Lithium-sulfur batteries. (L1: Co<sub>3</sub>O<sub>4</sub> nanoneedle array on carbon cloth,<sup>[1]</sup> L2: mesoporous SnO<sub>2</sub> nanosheets on carbon nanofibers,<sup>[2]</sup> L3: TiO<sub>2</sub> nanowires on carbon cloth,<sup>[3]</sup> L4: WS<sub>2</sub> nanosheets on carbon cloth,<sup>[4]</sup> L5: TiO<sub>2</sub> wrapping layer on carbon fiber,<sup>[5]</sup> L6: TiO<sub>2</sub>-grafted carbon paper<sup>[6]</sup>).

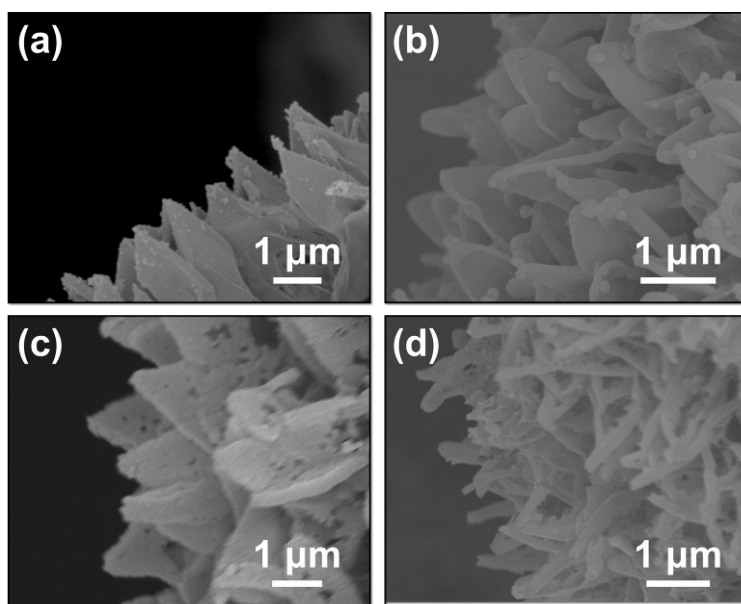

**Fig. S17.** FE-SEM images of CC@Co<sub>9</sub>S<sub>8</sub>-Co<sub>4</sub>N show the different sulfidation reaction after (a) 0.5, (b) 1, (c) 2 and (d) 4 h.

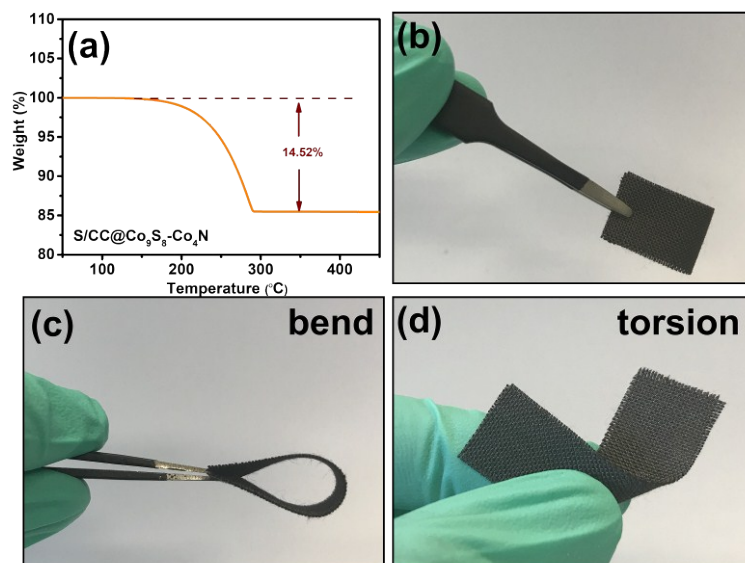

**Fig. S18.** (a) TGA curve of S/CC@Co<sub>9</sub>S<sub>8</sub>-Co<sub>4</sub>N. (b-d) Digital images of the bend and torsion states of the S/CC@Co<sub>9</sub>S<sub>8</sub>-Co<sub>4</sub>N.

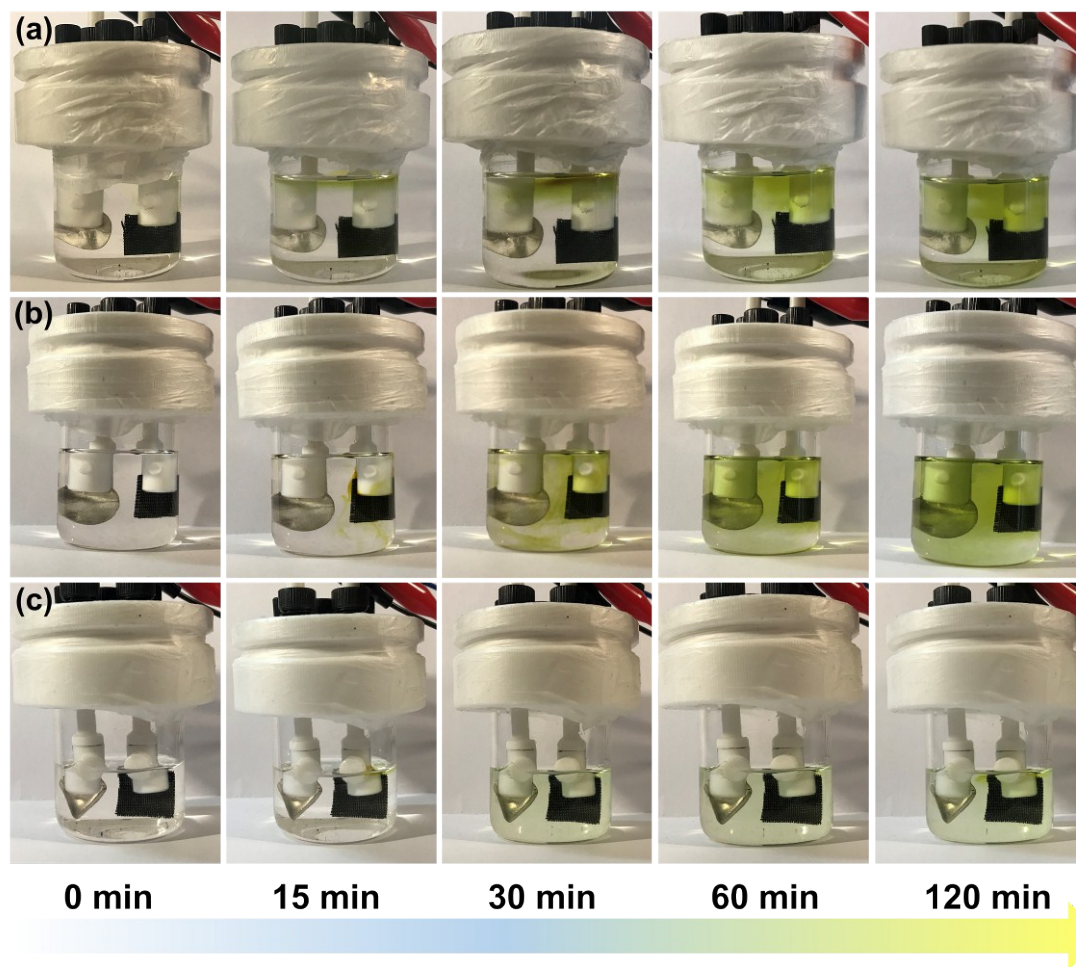

**Fig. S19.** Visual illustration of polysulfide entrapment of (a)  $S/CC@Co_9S_8$ , (b)  $S/CC$  and (c)  $S/CC@Co_9S_8-Co_4N$  composites.

**Tab. S1.** Co content and quantitative elemental analysis of the CC@Co<sub>9</sub>S<sub>8</sub> and CC@Co<sub>9</sub>S<sub>8</sub>-Co<sub>4</sub>N.

| Sample                                               | Icp<br>Co(%) | Element |        |        |        |        |
|------------------------------------------------------|--------------|---------|--------|--------|--------|--------|
|                                                      |              | C(wt%)  | H(wt%) | N(wt%) | S(wt%) | O(wt%) |
| CC@Co <sub>9</sub> S <sub>8</sub>                    | 5.41         | 73.63   | 0.23   | 1.25   | 19.86  | 0.05   |
| CC@Co <sub>9</sub> S <sub>8</sub> -Co <sub>4</sub> N | 4.50         | 71.41   | 5.33   | 2.53   | 12.96  | 0.07   |

**Tab. S2.** Performance comparison of CC@Co<sub>9</sub>S<sub>8</sub>-Co<sub>4</sub>N with other representative sulfur host materials for Li-S batteries in the literatures.

| Ref.             | Sulfur host materials                                   | Sulfur loading in electrodes (mg cm <sup>-2</sup> ) | Current density (1C=1675 mAh g <sup>-1</sup> ) | Cycle number | Decay per cycle |
|------------------|---------------------------------------------------------|-----------------------------------------------------|------------------------------------------------|--------------|-----------------|
| <b>This work</b> | <b>S/CC@Co<sub>9</sub>S<sub>8</sub>-Co<sub>4</sub>N</b> | <b>1.4~2.0</b>                                      | <b>1 C</b>                                     | <b>1000</b>  | <b>0.030%</b>   |
|                  |                                                         | <b>1.4~2.0</b>                                      | <b>5 C</b>                                     | <b>1000</b>  | <b>0.027%</b>   |
|                  |                                                         | <b>6.1</b>                                          | <b>0.2 C</b>                                   | <b>200</b>   | <b>0.084%</b>   |
| Ref. S2          | C@SnO <sub>2</sub> /S                                   | 2.0                                                 | 2 C                                            | 1000         | 0.024%          |
| Ref. S3          | CC/TiO <sub>2</sub> /S                                  | 1.5~2.0                                             | 1 C                                            | 700          | 0.045%          |
| Ref. S5          | TiO <sub>2</sub> -ACF                                   | 3.2                                                 | 0.2 C                                          | 100          | 0.023%          |
| Ref. S6          | CP@TiO <sub>2</sub> -S                                  | 2.0                                                 | 1 C                                            | 500          | 0.11%           |
| Ref. S7          | Co <sub>9</sub> S <sub>8</sub> -Celgard                 | 2.0                                                 | 1 C                                            | 1000         | 0.041%          |
| Ref. S8          | Co <sub>4</sub> N/S                                     | 1.5~2.0                                             | 2 C                                            | 300          | 0.01%           |
| Ref. S9          | S@Co/N-PCNSs                                            | 0.8~1.0                                             | 5 C                                            | 400          | 0.036%          |
| Ref. S10         | Activated CNF Sheets                                    | 2.4                                                 | C/3                                            | 500          | 0.088%          |
| Ref. S11         | GOPAA                                                   | 0.8                                                 | 0.5 C                                          | 100          | 0.22%           |

**Tab. S3.** The relative parameters of S/CC@Co<sub>9</sub>S<sub>8</sub>-Co<sub>4</sub>N at different current densities from 0.2 C to 5 C.

|      | $m_s/\text{mg}$ | $C_s/\text{mAh g}^{-1}$ | $C_e/\text{mAh g}^{-1}$ | $I/\text{mA}$ | $V/\text{v}$ | $E_m/\text{Wh kg}^{-1}$ | $P_m/\text{W kg}^{-1}$ |
|------|-----------------|-------------------------|-------------------------|---------------|--------------|-------------------------|------------------------|
| 0.2C | 1.41            | 1657                    | 230                     | 0.47          | 2.10         | 342                     | 700                    |
| 0.5C | 1.41            | 1268                    | 176                     | 1.18          | 2.08         | 259                     | 1740                   |
| 1 C  | 1.41            | 1197                    | 166                     | 2.36          | 2.05         | 241                     | 3431                   |
| 2 C  | 1.41            | 1043                    | 145                     | 4.72          | 2.00         | 205                     | 6695                   |
| 3 C  | 1.41            | 911                     | 126                     | 7.08          | 1.95         | 174                     | 9791                   |
| 4 C  | 1.41            | 756                     | 105                     | 9.44          | 1.90         | 141                     | 12720                  |
| 5 C  | 1.41            | 647                     | 90                      | 11.8          | 1.86         | 118                     | 15565                  |

$m_s$ : the mass of cathode electrodes with the diameter of 10 mm;

$C_s$ : the discharge capacity in the different current densities of sulfur;

$C_e$ : the discharge capacity in the different current densities of cathode;

$I$ : the charge/discharge current of electrodes;

$V$ : average voltage of discharge;

$E_m$ : specific energy density;

$P_m$ : specific power density.

**Note that specific energy density ( $E_m$ ) and power density ( $P_m$ ) are calculated by the following**

**equations:  $E_m = V \times C_e / m_s$ ,  $P_m = I \times V / m_s$ ,  $C$  is the discharge capacity at different rates in Fig. 5c.**

## References

- S1 Z. Chang, H. Dou, B. Ding, J. Wang, Y. Wang, X. Hao, D. R. MacFarlane, *J. Mater. Chem. A*, 2017, **5**, 250.
- S2 M. Wang, L. Fan, X. Wu, D. Tian, J. Cheng, Y. Qiu, H. Wu, B. Guan, N. Zhang, K. Sun, Y. Wang, *J. Mater. Chem. A*, 2017, **5**, 19613.
- S3 T. Lei, Y. Xie, X. Wang, S. Miao, J. Xiong, C. Yan, *Small*, 2017, **13**, 1701013.
- S4 T. Lei, W. Chen, J. Huang, C. Yan, H. Sun, C. Wang, W. Zhang, Y. Li, J. Xiong, *Adv. Energy Mater.*, 2017, **7**, 1601843.
- S5 K. Y. Xie, K. Zhang, Y. Z. Han, K. Yuan, Q. Song, J. G. Wang, C. Shen, X. R. Liu, B. Q. Wei, *Electrochim. Acta*, 2016, **210**, 415.
- S6 Z. Zhang, Q. Li, K. Zhang, W. Chen, Y. Lai, J. Li, *J. Power Sources*, 2015, **290**, 159.
- S7 J. He, Y. Chen and A. Manthiram, *Energy Environ. Sci*, 2018, **11**, 2560-2568.
- S8 D. R. Deng, F. Xue, Y. J. Jia, J. C. Ye, C. D. Bai, M. S. Zheng and Q. F. Dong, *ACS Nano*, 2017, **11**, 6031-6039.
- S9 S. Liu, J. Li, X. Yan, Q. Su, Y. Lu, J. Qiu, Z. Wang, X. Lin, J. Huang, R. Liu, B. Zheng, L. Chen, R. Fu and D. Wu, *Adv. Mater.*, 2018, **30**, 1706895.
- S10 L. Qie, C. Zu and A. Manthiram, *Adv. Energy Mater.*, 2016, **6**, 1502459.
- S11 G. Xu, Q.-b. Yan, A. Kushima, X. Zhang, J. Pan and J. Li, *Nano Energy*, 2017, **31**, 568-574.
